# Supplementary material for: Improving Antimicrobial Stewardship Program Using the Lean Six Sigma Methodology: A Descriptive Study from Mediclinic Welcare Hospital in Dubai, the UAE
Source: MDPI journal article supplement (doi:10.3390/healthcare11233048), 2023-11-27
Supplement: s1 [file s1]

**Table S1.** Data for AED expenditures per each parenteral antimicrobial agent collected between Jan 2021 to July 2022.

| <b>AMR agent</b>                  | <b>2021 AED expenditures</b> | <b>AMR agent</b>                  | <b>January–July 2022 AED expenditures</b> |
|-----------------------------------|------------------------------|-----------------------------------|-------------------------------------------|
| Aciclovir                         | 26,410                       | Aciclovir                         | 5,437                                     |
| Amikacin                          | 5,455                        | Amikacin                          | 1,240                                     |
| Amoxicillin/potassium clavulanate | 13,528                       | Amoxicillin/potassium clavulanate | 5,142                                     |
| Amphotericin B liposome           | 38,089                       | Amphotericin B liposome           | 0                                         |
| Ampicillin                        | 15,369                       | Ampicillin                        | 5,562                                     |
| Anidulafungin                     | 8,821                        | Anidulafungin                     | 0                                         |
| Azithromycin                      | 19,253                       | Azithromycin                      | 16,459                                    |
| Benzathine benzylpenicillin       | 0                            | Benzathine benzylpenicillin       | 59                                        |
| Caspofungin                       | 1,367,605                    | Caspofungin                       | 60,370                                    |
| Cefazolin                         | 22,677                       | Cefazolin                         | 7,973                                     |
| Cefepime                          | 12,181                       | Cefepime                          | 3,499                                     |
| Cefotaxime                        | 12,296                       | Cefotaxime                        | 13,001                                    |
| Ceftazidime                       | 30,941                       | Ceftazidime                       | 900                                       |
| Ceftazidime/avibactam             | 266,634                      | Ceftazidime/avibactam             | 29,520                                    |
| Ceftobiprole medocaril            | 6,691                        | Ceftobiprole medocaril            | 5,282                                     |
| Ceftriaxone                       | 446,635                      | Ceftriaxone                       | 5,358                                     |
| Cefuroxime                        | 47,279                       | Cefuroxime                        | 144,318                                   |
| Ciprofloxacin                     | 104,570                      | Ciprofloxacin                     | 23,726                                    |
| Colistimethate                    | 2,032                        | Colistimethate                    | 48,306                                    |
| Doxycycline                       | 419                          | Doxycycline                       | 1,355                                     |
| Ertapenem                         | 46,587                       | Ertapenem                         | 35,989                                    |
| Fluconazole                       | 62,320                       | Fluconazole                       | 7,133                                     |
| Gentamicin                        | 7,565                        | Gentamicin                        | 1,143                                     |
| Isavuconazole                     | 215,573                      | Isavuconazole                     | 0                                         |
| Levofloxacin                      | 90,407                       | Levofloxacin                      | 16,907                                    |
| Linezolid                         | 121,881                      | Linezolid                         | 4,163                                     |
| Meropenem                         | 293,478                      | Meropenem                         | 35,034                                    |
| Metronidazole                     | 37,494                       | Metronidazole                     | 17,157                                    |
| Moxifloxacin                      | 8,059                        | Moxifloxacin                      | 4,925                                     |
| Piperacillin/tazobactam           | 120,558                      | Piperacillin/tazobactam           | 26,220                                    |
| Sulfamethoxazole/trimethoprim     | 2,610                        | Sulfamethoxazole/trimethoprim     | 0                                         |
| Teicoplanin                       | 2,517                        | Teicoplanin                       | 719                                       |
| Tigecycline                       | 72,108                       | Tigecycline                       | 20,664                                    |
| Vancomycin                        | 74,928                       | Vancomycin                        | 8,262                                     |
| Voriconazole                      | 53,320                       | Voriconazole                      | 8,967                                     |



|                                           |             |             |             |             |             |             |             |             |             |             |             |             |             |             |             |          |             |             |             |
|-------------------------------------------|-------------|-------------|-------------|-------------|-------------|-------------|-------------|-------------|-------------|-------------|-------------|-------------|-------------|-------------|-------------|----------|-------------|-------------|-------------|
| Levofloxacin Hemihydrate                  | 8.21        | 11.4<br>3   | 9.26        | 4.45        | 2.81        | 4.79        | 5.06        | 9.61        | 1.1         | 1.85        | 2.91        | 2.95        | 3.21        | 2.44        | 4.22        | 2.36     | 2.77        | 2.76        | 4.12        |
| Linezolid                                 | 0           | 3.2         | 7.3         | 3.13        | 0.05        | 0           | 1.16        | 4.4         | 2.65        | 0           | 0.11        | 0.14        | 0.47        | 0           | 0           | 0.76     | 0.15        | 1.28        | 0           |
| Meropenem                                 | 4.36        | 14.7<br>3   | 11.1<br>5   | 8.67        | 2.89        | 4.16        | 7.53        | 17          | 9.99        | 5.96        | 1.27        | 1.54        | 3.62        | 5.96        | 2.31        | 1.67     | 3.44        | 1.23        | 1.17        |
| Metronidazole                             | 3.13        | 1.28        | 2.66        | 3.34        | 3.51        | 2.4         | 3.61        | 4.81        | 3.38        | 3.88        | 3.81        | 2.38        | 3.47        | 5.11        | 2.62        | 5.32     | 2.87        | 2.04        | 3.55        |
| Moxifloxacin Hydrochloride                | 0           | 0           | 0.45        | 0.59        | 0           | 0           | 0.63        | 0           | 0           | 0.06        | 0.56        | 0.43        | 0           | 0.87        | 0.17        | 0.19     | 1.08        | 0.27        | 0.3         |
| Piperacillin Sodium,<br>Tazobactam Sodium | 0.89        | 5.74        | 7.55        | 4.23        | 2.67        | 0.69        | 2.52        | 2.12        | 4.64        | 1.47        | 0.74        | 1.11        | 4.67        | 0.27        | 1.95        | 2.19     | 0.9         | 3.52        | 1.89        |
| Teicoplanin                               | 0           | 0           | 0           | 0           | 0.15        | 0           | 0.05        | 0.43        | 0           | 0           | 0.11        | 0           | 0           | 0           | 0.25        | 0        | 0           | 0           | 0.1         |
| Tigecycline                               | 0           | 0           | 1.11        | 4.01        | 0.98        | 0.48        | 0           | 0.43        | 1.36        | 0           | 0           | 0           | 1.06        | 0.04        | 0.25        | 0.28     | 0.81        | 0.27        | 0.35        |
| Vancomycin Hydrochloride                  | 2.67        | 4.06        | 4.29        | 1.21        | 0.72        | 0.52        | 0.95        | 1.06        | 2.35        | 1.15        | 0.71        | 0.31        | 0.76        | 0.63        | 0.57        | 0.54     | 0.79        | 0.61        | 0.65        |
| Voriconazole                              | 0           | 0.62        | 0.26        | 1.47        | 0.28        | 0           | 0.14        | 0.38        | 0.66        | 0           | 0           | 0           | 0.35        | 0           | 0           | 0.71     | 0.15        | 0.2         | 0           |
| <b>Average Monthly DDD</b>                | <b>1.72</b> | <b>2.62</b> | <b>2.91</b> | <b>2.47</b> | <b>1.84</b> | <b>1.46</b> | <b>1.84</b> | <b>2.22</b> | <b>2.08</b> | <b>1.46</b> | <b>1.41</b> | <b>1.67</b> | <b>1.69</b> | <b>1.68</b> | <b>1.53</b> | <b>2</b> | <b>1.65</b> | <b>1.73</b> | <b>1.65</b> |

**Table S3. Number of patients received at least one restricted antimicrobial agent per admission vs total number of IP admitted patients.**

| Measure                                                                                   | Sep-21 | Oct-21 | Nov-21 | Dec-21 | Jan-22 | Feb-22 | Mar-22 | Apr-22 | May-22 | Jun-22 | Jul-22 |
|-------------------------------------------------------------------------------------------|--------|--------|--------|--------|--------|--------|--------|--------|--------|--------|--------|
| Number of patients who received at least one restricted antimicrobial agent per admission | 35     | 23     | 17     | 18     | 36     | 24     | 21     | 21     | 18     | 26     | 15     |
| Total number of admitted patients                                                         | 667    | 741    | 668    | 676    | 639    | 672    | 799    | 714    | 864    | 913    | 676    |
| Actual                                                                                    | 5.25%  | 3.10%  | 2.54%  | 2.66%  | 5.63%  | 3.57%  | 2.63%  | 2.94%  | 2.08%  | 2.85%  | 2.22%  |

**Table S4. Surgical Prophylaxis Appropriateness.**

| Month  | Criteria 1 | Criteria 2 | Criteria 3 | Criteria 4 | Total Compliance | No. of Surgeries |
|--------|------------|------------|------------|------------|------------------|------------------|
| Jan-22 | 73%        | 73%        | 73%        | 53%        | 68%              | 17               |
| Feb-22 | 85%        | 85%        | 85%        | 15%        | 68%              | 13               |
| Mar-22 | 100%       | 100%       | 100%       | 33%        | 83%              | 12               |
| Apr-22 | 78%        | 89%        | 89%        | 33%        | 72%              | 18               |
| May-22 | 100%       | 100%       | 100%       | 54%        | 89%              | 15               |
| Jun-22 | 96%        | 96%        | 96%        | 21%        | 77%              | 24               |
| Jul-22 | 100%       | 100%       | 100%       | 53%        | 88%              | 18               |

**Table S5. Clinical pharmacist ASP intervention frequency (De-escalation, Dose optimization, Discontinuation).**

| Intervention Type   | Apr-22 | May-22 | Jun-22 | Jul-22 |
|---------------------|--------|--------|--------|--------|
| De-escalation       | 3      | 6      | 7      | 10     |
| Dose Optimization   | 8      | 12     | 18     | 22     |
| Discontinuation     | 8      | 6      | 10     | 13     |
| Total Interventions | 19     | 24     | 35     | 45     |
